# Supplementary material for: Time-resolved laser spectroscopy for the in situ characterization of methacrylate monomer flow within spruce
Source: Springer Nature journal article supplement (doi:10.1007/s00226-016-0882-5), 2016-12-22
Supplement: MOESM1 [file 11953728]

**Supporting information for:**  
**Time resolved laser spectroscopy for the in situ**  
**characterization of methacrylate monomer flow**  
**within Spruce**

Emma-Rose Janeček,<sup>†</sup> Zarah Walsh-Korb,<sup>†</sup> Ilaria Bargigia,<sup>‡</sup> Andrea Farina,<sup>¶</sup>  
Michael H. Ramage,<sup>§</sup> Cosimo D'Andrea,<sup>‡</sup> Austin Nevin,<sup>||</sup> Antonio Pifferi,<sup>‡</sup> and  
Oren A. Scherman<sup>\*,†</sup>

<sup>†</sup>*Melville Laboratory for Polymer Synthesis, Department of Chemistry, University of  
Cambridge, Cambridge, CB2 1EW*

<sup>‡</sup>*Politecnico di Milano, Milano, Italy*

<sup>¶</sup>*Politecnico di Milano, Milano, Italy and Centro Nazionale di Ricerca, Istituto di  
Fotonica e Nanotecnologie, Milano, Italy.*

<sup>§</sup>*Department of Architecture, University of Cambridge, United Kingdom.*

<sup>||</sup>*Centro Nazionale di Ricerca, Istituto di Fotonica e Nanotecnologie, Milano, Italy.*

E-mail: oas23@cam.ac.uk

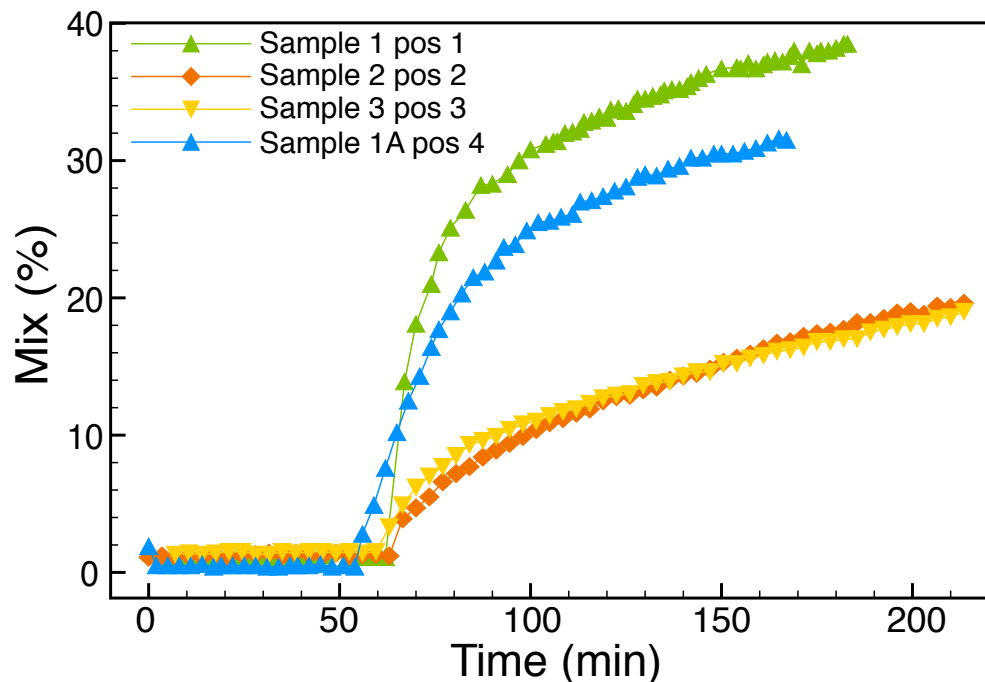

Figure S1: Percentage of monomer relative to the total mass of the treated sample, per  $\text{cm}^3$  calculated from spectra taken at a specific positions along the length of treated spruce and monitored over time. Time = 0 min, monomer added to the sample and vacuum applied. Time = 60 min ( $\pm 5$  min), vacuum released and samples allowed to soak.

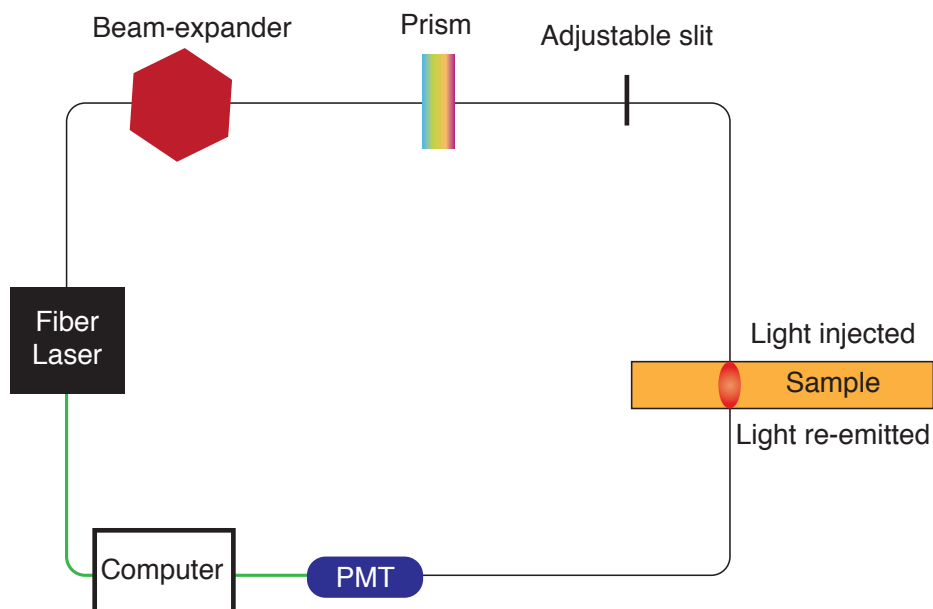

Figure S2: Schematic of a simplified version of the optical set-up.
